# Supplementary material for: Photonic crystal coupled plasmonic nanoparticle array for resonant enhancement of light harvesting and power conversion
Source: Royal Society of Chemistry journal article supplement (doi:10.1039/c2cp42438j), 2012-01-01
Supplement: c2cp42438j.pdf [file c2cp42438j.pdf]

## Supplementary Information

# **Photonic Crystals Coupling Plasmonic Nanoparticles Array for Resonant Enhancement of Light Harvesting and Power Conversion**

**Haoran Li,<sup>a</sup> Xiaobin Hu,<sup>\*a</sup> Wei Hong,<sup>a</sup> Feiyang Cai,<sup>a</sup> Qi Tang,<sup>a</sup> Binyuan Zhao,<sup>\*a</sup> Di Zhang,<sup>\*a</sup> Ping Cheng<sup>b</sup>**

<sup>a</sup>State Key Lab of Metal Matrix Composites, School of Materials Science and Engineering, Shanghai Jiaotong University, Shanghai 200240, China.

<sup>b</sup>Research Institute of Micro/Nano Science and Technology, Shanghai Jiao Tong University, Shanghai 200240, China.

[hxb@sjtu.edu.cn](mailto:hxb@sjtu.edu.cn) (X. Hu), [byzhao@sjtu.edu.cn](mailto:byzhao@sjtu.edu.cn) (B. Zhao), [zhangdi@sjtu.edu.cn](mailto:zhangdi@sjtu.edu.cn) (D. Zhang)

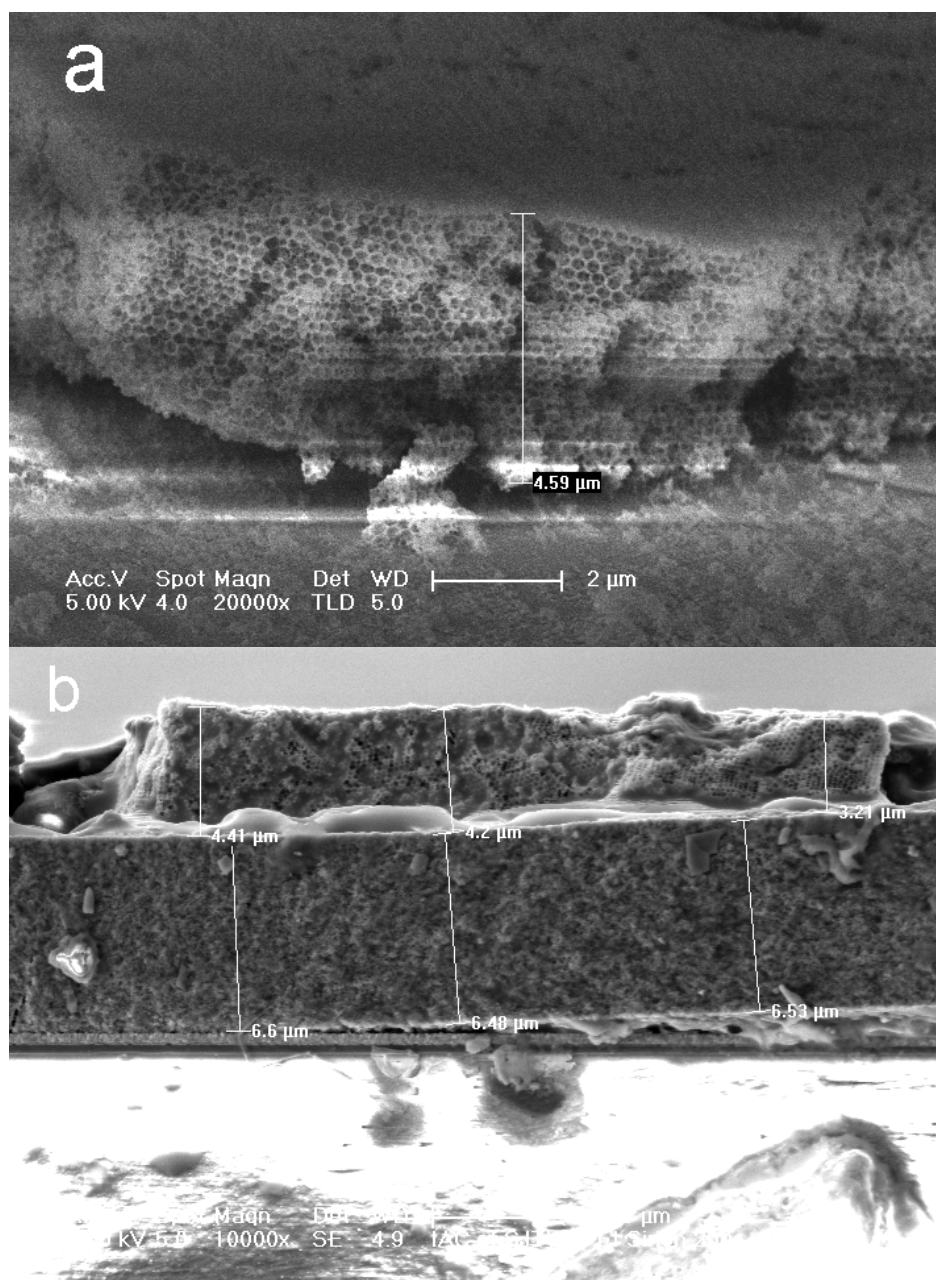

**Supplementary Figure S1.** (a) Side views of pc-TiO<sub>2</sub> film. (b) Side views of a two-layer film with one nc-TiO<sub>2</sub> layer and one pc-TiO<sub>2</sub> layer.

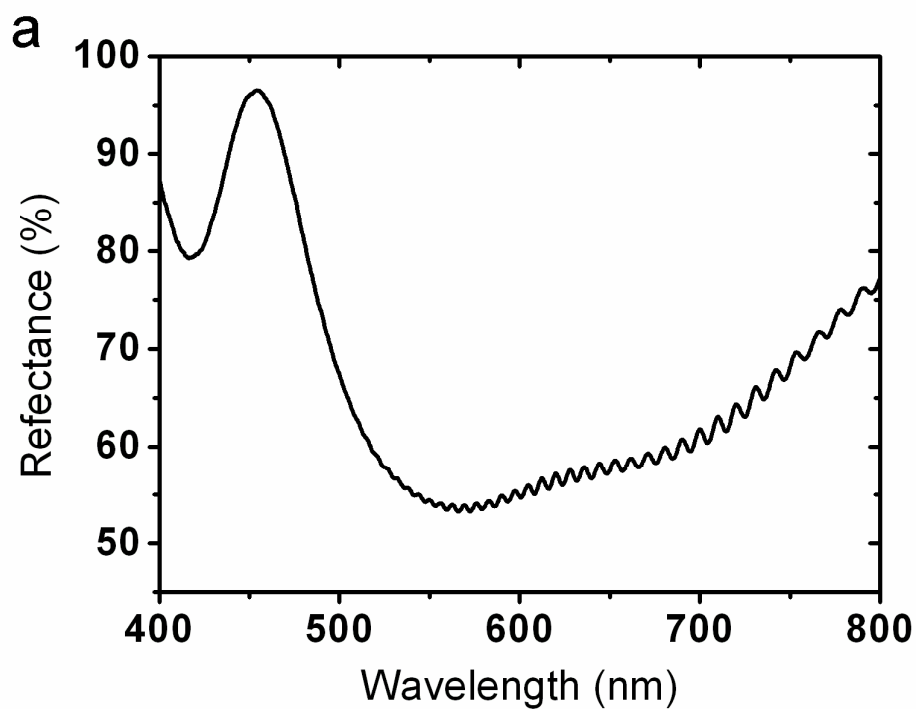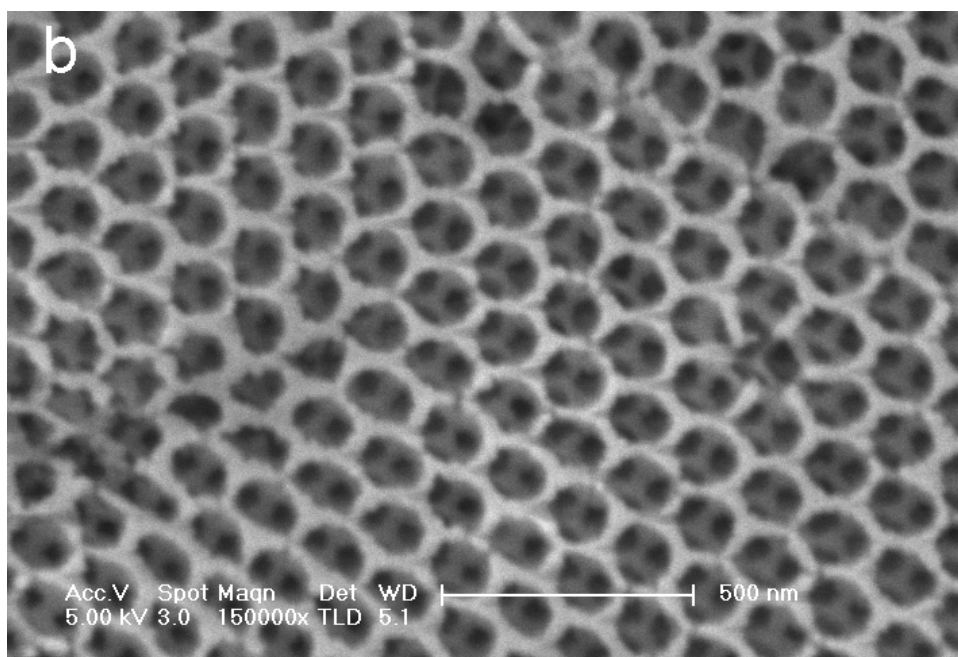

**Supplementary Figure S2.** (a) Reflective spectrum of an inverse opal  $\text{TiO}_2$  film with 204 nm macropores (with a reflection peak at 456 nm). The data is obtained by a Maya2000-Pro Spectrometer and taking a common mirror as a reflective reference,

which reflections is 100% for all wavelength light. (b) SEM morphology of an inverse opal  $\text{TiO}_2$  with 204 nm macropores.

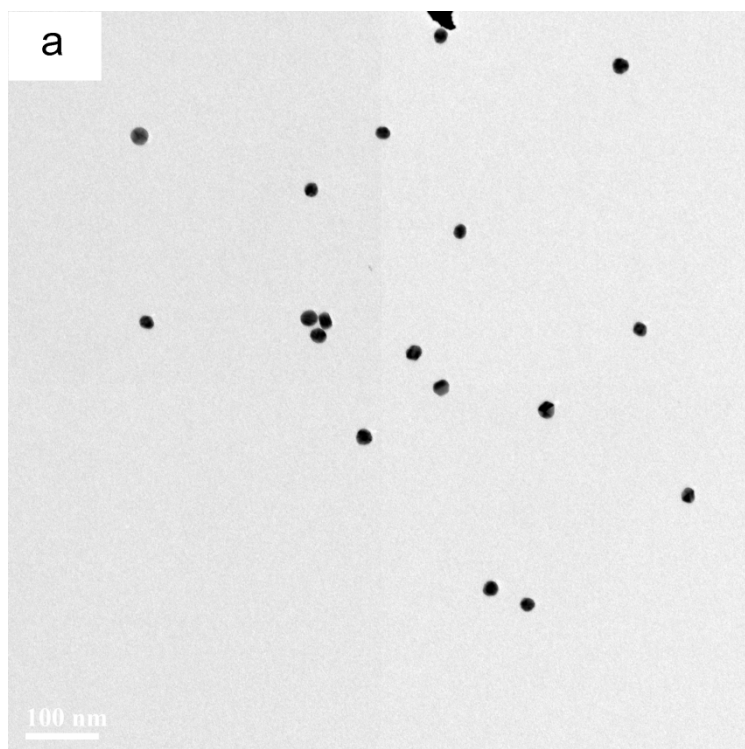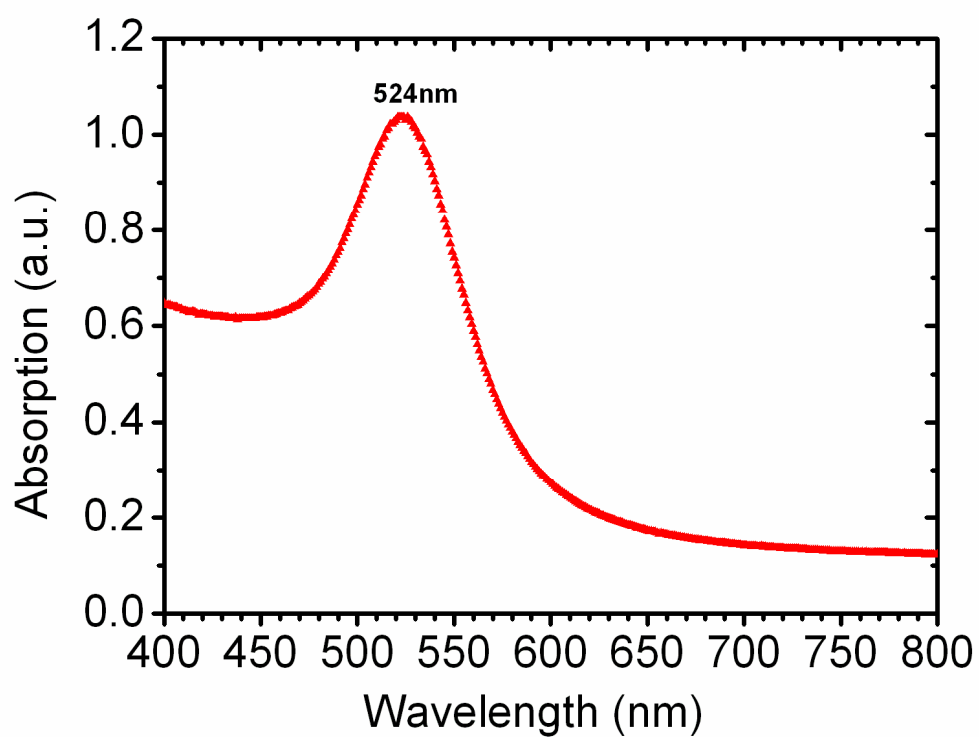

**Supplementary Figure S3.** (a) TEM morphology and (b) light absorption of 20 nm Au nanoparticles with 29.4 mM concentration in an aqueous solution.

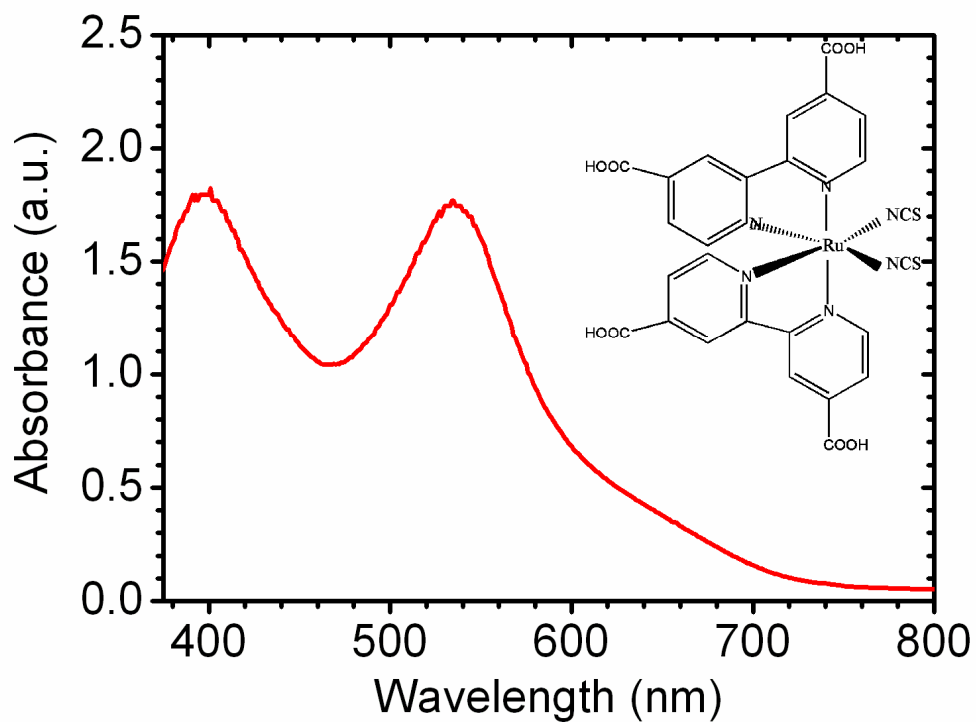

**Supplementary Figure S4.** Absorption of N3 in a 0.125 mM alcohol solution. Inset: molecular structure of N3.
